# Supplementary material for: Surface-driven fast sodium storage enabled by Se-doped honeycomb-like macroporous carbon
Source: Royal Society of Chemistry journal article supplement (doi:10.1039/d2cp05318g), 2023-01-01
Supplement: d2cp05318g1.pdf [file d2cp05318g1.pdf]

## Supplementary Materials

### Surface-driven fast sodium storage enabled by Se-doped honeycomb-like macroporous carbon

Minglu Zhang<sup>a</sup>, Meng Ning<sup>a</sup>, Kairong Xiong<sup>b,\*</sup>, Zhihua Duan<sup>a,c</sup>, Xiaoqing Yang<sup>a</sup>,  
Zhenghui Li<sup>a,\*</sup>

<sup>a</sup> School of Materials and Energy, Guangdong University of Technology, Guangzhou  
510006, China

<sup>b</sup> School of Environmental Science and Engineering, Guangdong University of  
Technology, Guangzhou 510006, China

<sup>c</sup> Institute of Analysis, Guangdong Academy of Sciences, China National Analytical  
Center, Guangzhou 510006, China

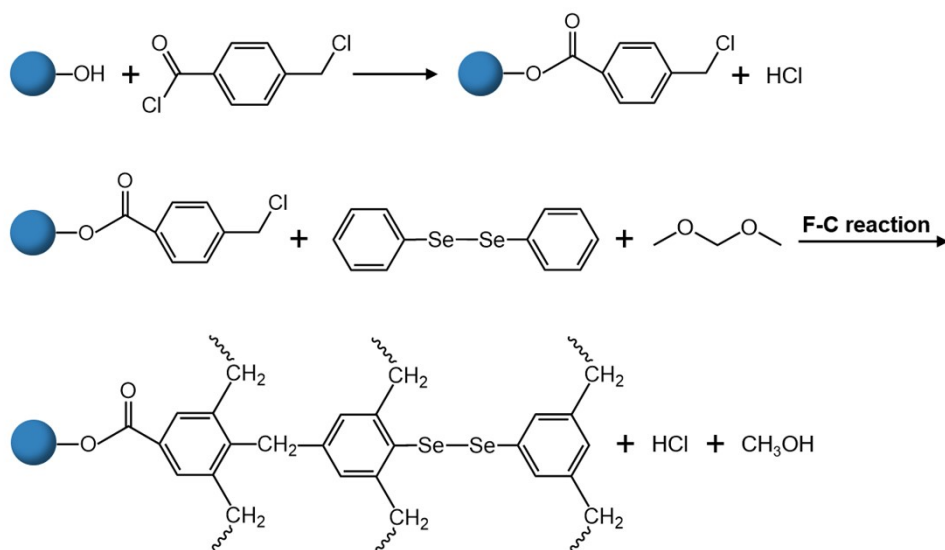

**Fig. S1.** The typical reaction mechanism of Se-HMC.

\* E-mail addresses: [xkr963@gdut.edu.cn](mailto:xkr963@gdut.edu.cn) (K. Xiong), [lizhengh@gdut.edu.cn](mailto:lizhengh@gdut.edu.cn) (Z. Li)

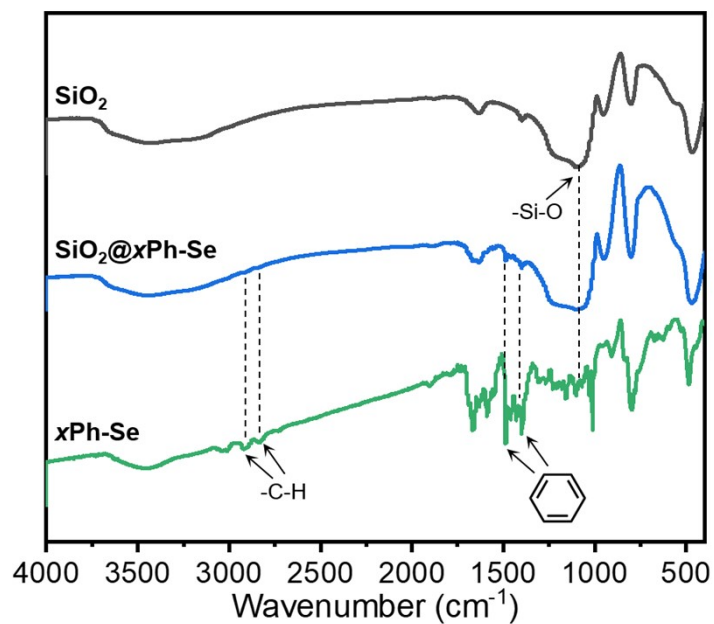

**Fig. S2.** FT-IR spectra of SiO<sub>2</sub>, SiO<sub>2</sub>@xPh-Se, and xPh-Se. The xPh-Se is obtained by etching the SiO<sub>2</sub> template from SiO<sub>2</sub>@xPh-Se.

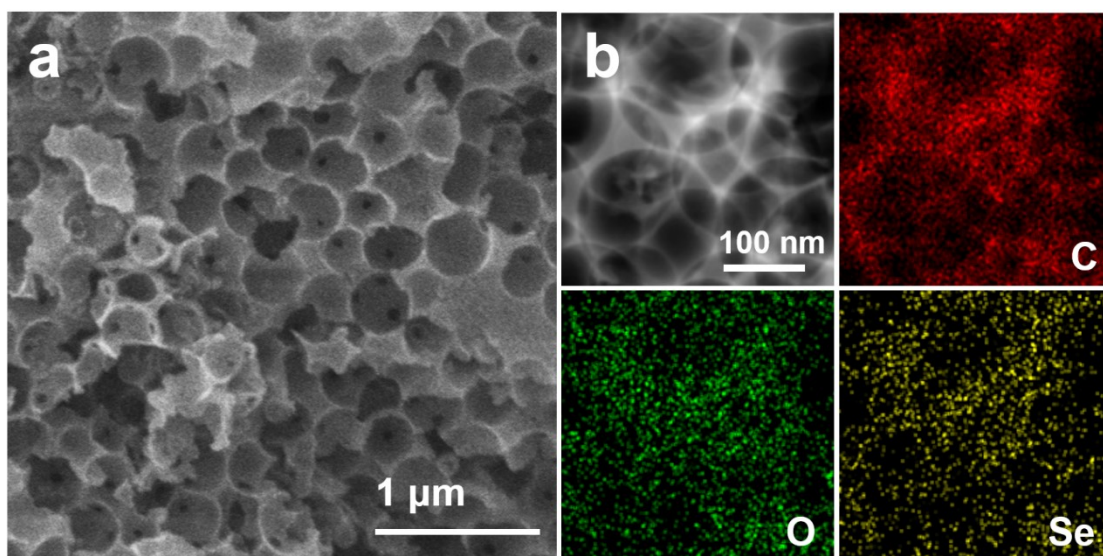

**Fig. S3.** Microstructural characterization of Se-HMC-500: (a) SEM image, (b) Dark-field TEM image, and corresponding elemental mapping images.

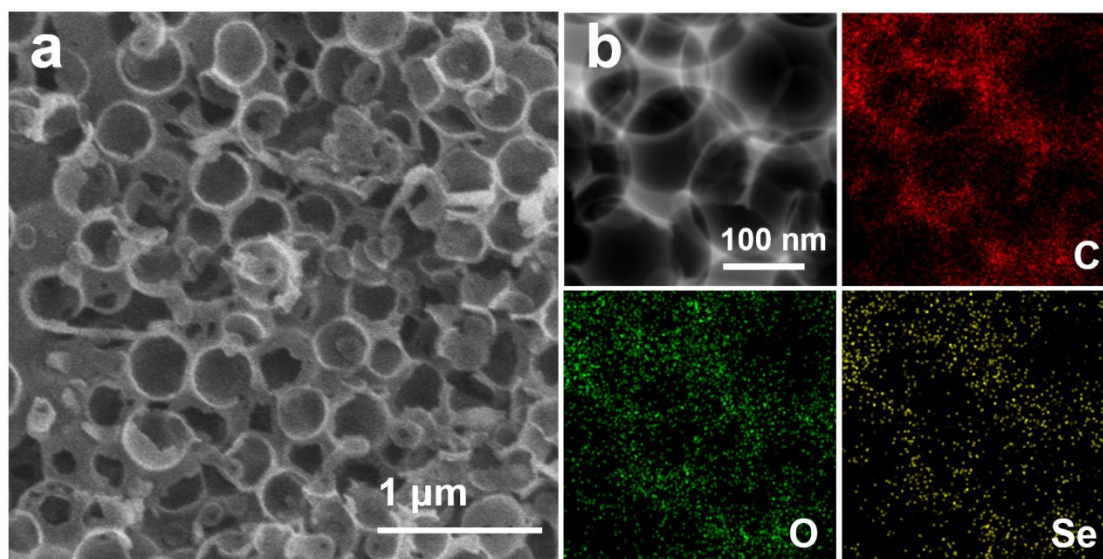

**Fig. S4.** Microstructural characterization of Se-HMC-700: (a) SEM image, (b) Dark-field TEM image, and corresponding elemental mapping images.

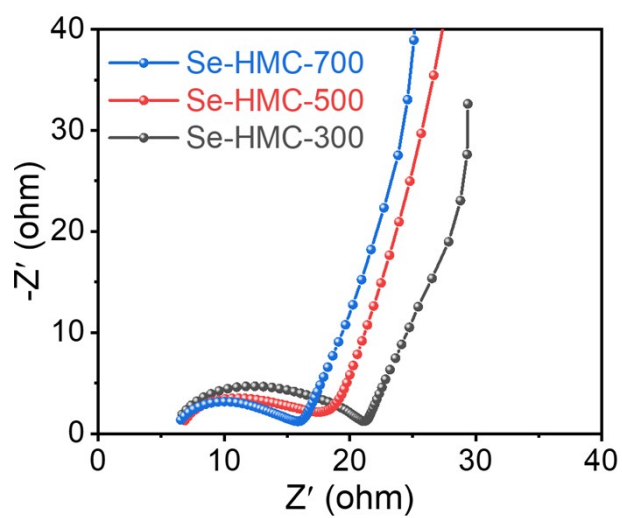

**Fig. S5.** The electrochemical impedance spectra of Se-HMC.

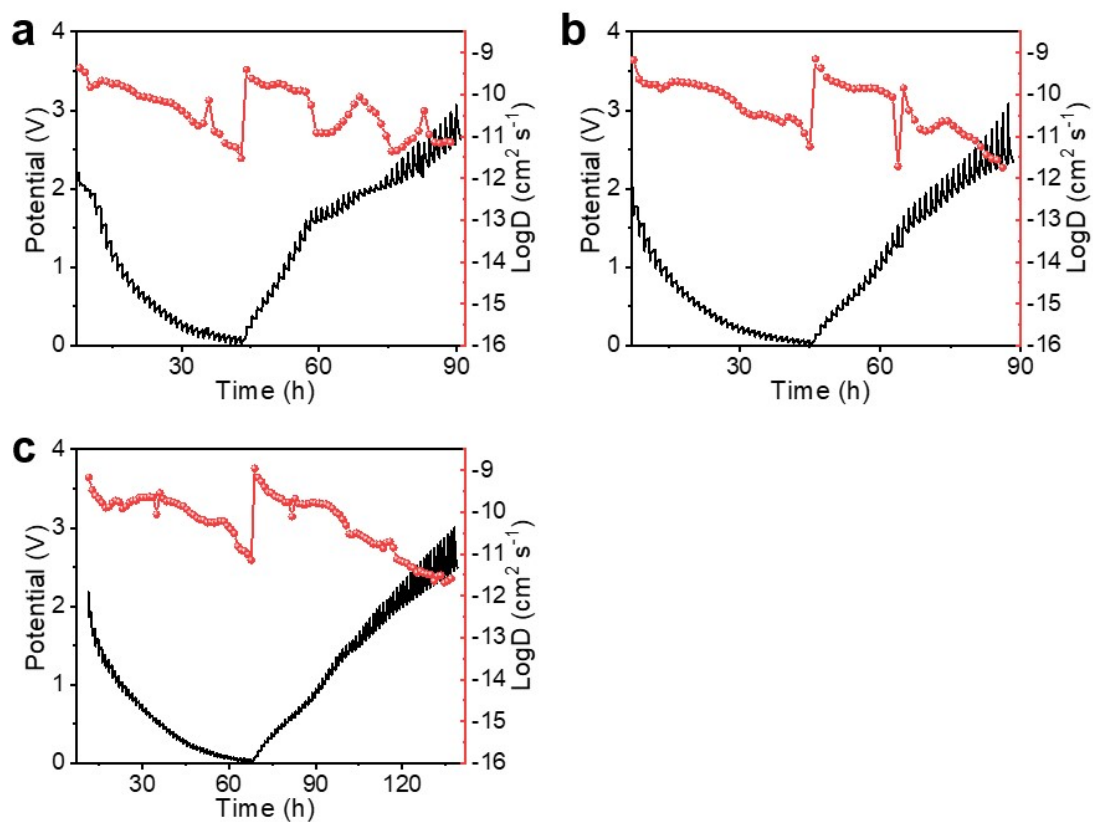

**Fig. S6.** The GITT curves of (a) Se-HMC-300, (b) Se-HMC-500 and (c) Se-HMC-700.

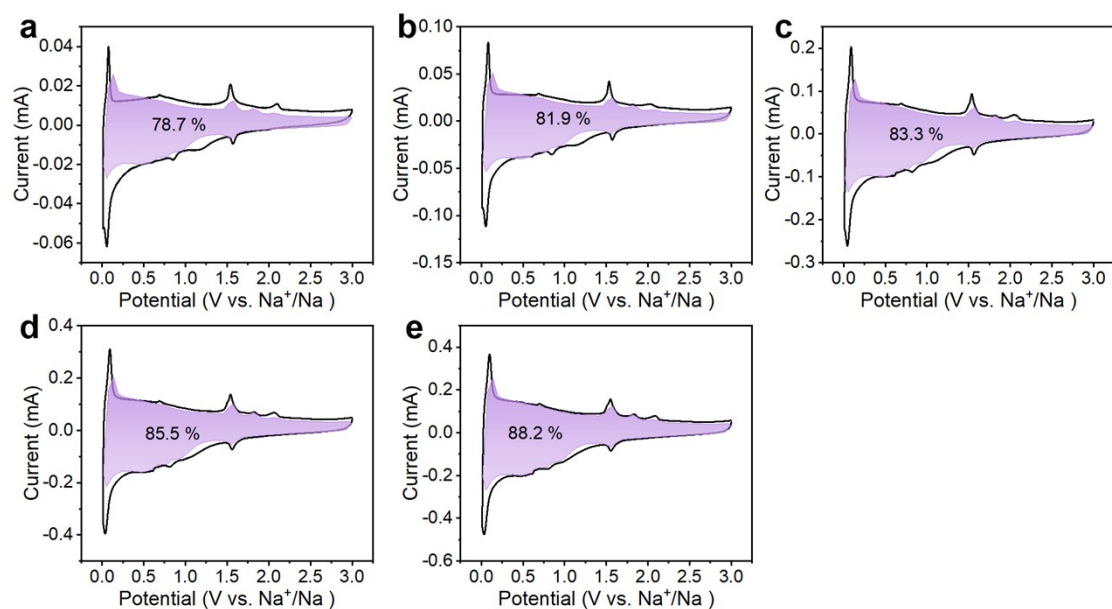

**Fig. S7.** CV curves displaying the capacitance contribution (purple area) to the total current at (a) 0.1, (b) 0.2, (c) 0.5, (d) 0.8, and (e) 1 mV s<sup>-1</sup> of Se-HMC-700.

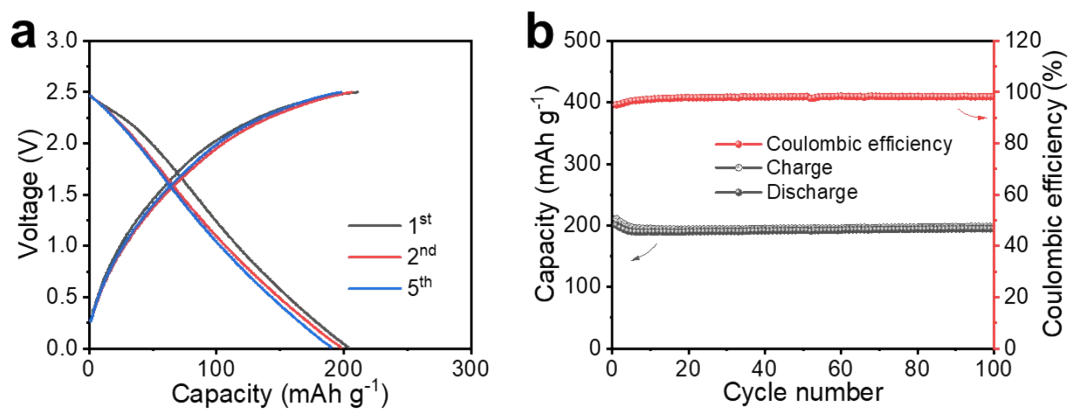

**Fig. S8.** The Na storage performance of  $\text{Na}_3\text{V}_2(\text{PO}_4)_3//\text{Se-HMC-700}$  full cell: (a) galvanostatic charge/discharge curves for the 1<sup>st</sup>, 2<sup>nd</sup> and 5<sup>th</sup> cycles; (b) cycling stability with a current density of  $0.1 \text{ A g}^{-1}$ .

**Table S1.** The weight fractions of different elements calculated by XPS.

|            | C   | Se  | O   |
|------------|-----|-----|-----|
| Se-HMC-300 | 56% | 37% | 7%  |
| Se-HMC-500 | 80% | 11% | 9%  |
| Se-HMC-700 | 77% | 10% | 13% |

**Table S2.** Comparison of the rate capability for different types of carbon anodes.

| Ref.             | Sample                              | Capacity                            |                                       | Capacity                            |                                       | C <sub>2</sub> /C <sub>1</sub> |
|------------------|-------------------------------------|-------------------------------------|---------------------------------------|-------------------------------------|---------------------------------------|--------------------------------|
|                  |                                     | (low current density)               |                                       | (high current density)              |                                       |                                |
|                  |                                     | I <sub>1</sub> (A g <sup>-1</sup> ) | C <sub>1</sub> (mAh g <sup>-1</sup> ) | I <sub>2</sub> (A g <sup>-1</sup> ) | C <sub>2</sub> (mAh g <sup>-1</sup> ) |                                |
| <b>This work</b> | <b>Se-HMC-700</b>                   | <b>0.1</b>                          | <b>334</b>                            | <b>5</b>                            | <b>251</b>                            | <b>75%</b>                     |
| [1]              | Sugarcane waste-derived hard carbon | 0.05                                | 322.4                                 | 2                                   | 73.6                                  | 23%                            |
| [2]              | N-doped carbon                      | 0.05                                | 343.2                                 | 2                                   | 129                                   | 38%                            |
| [3]              | O-doped carbon                      | 0.03                                | 382                                   | 2                                   | 152                                   | 40%                            |
| [4]              | B, N Co-doped carbon                | 0.05                                | 296.1                                 | 5                                   | 101.3                                 | 34%                            |
| [5]              | Pitch-based carbon                  | 0.1                                 | 296                                   | 10                                  | 124                                   | 42%                            |
| [6]              | N, S, P Co-doped carbon             | 0.1                                 | 281                                   | 5                                   | 100                                   | 36%                            |

## References

- [1] K. Yu, X. Wang, H. Yang, Y. Bai, C. Wu, Insight to defects regulation on sugarcane waste-derived hard carbon anode for sodium-ion batteries, *J. Energy Chem.* 55 (2021) 499-508.
- [2] S. Huang, D. Yang, X. Qiu, W. Zhang, Y. Qin, C. Wang, C. Yi, Boosting surface-dominated sodium storage of carbon anode enabled by coupling graphene nanodomains, nitrogen-doping, and nanoarchitecture engineering,

- Adv. Funct. Mater. 32 (2022) 2203279.
- [3] F. Sun, H. Wang, Z. Qu, K. Wang, L. Wang, J. Gao, J. Gao, S. Liu, Y. Lu, Carboxyl-dominant oxygen rich carbon for improved sodium ion storage: synergistic enhancement of adsorption and intercalation mechanisms, Adv. Energy Mater. 11 (2020) 2002981.
- [4] Y. Tang, X. Wang, J. Chen, D. Wang, Z. Mao, Synthesis of presodiated B, N Co-doped carbon materials and application in sodium ions batteries with enhanced initial coulombic efficiency, Chem. Eng. J. 427 (2022) 131951.
- [5] M. Hao, N. Xiao, Y. Wang, H. Li, Y. Zhou, C. Liu, J. Qiu, Pitch-derived N-doped porous carbon nanosheets with expanded interlayer distance as high-performance sodium-ion battery anodes, Fuel Process. Technol. 177 (2018) 328-335.
- [6] D. Yang, S. Li, D. Cheng, L. Miao, W. Zhong, X. Yang, Z. Li, Nitrogen, sulfur, and phosphorus codoped hollow carbon microtubes derived from silver willow blossoms as a high-performance anode for sodium-ion batteries, Energ. Fuel. 35 (2021) 2795-2804.
